# Supplementary material for: IGF2BP2-m6A-circMMP9 axis recruits ETS1 to promote TRIM59 transcription in laryngeal squamous cell carcinoma
Source: PubMed Central journal article supplement (PMC10847447; doi:10.1038/s41598-024-53422-4), 2024-02-06

Supplementary Figure The original images of blots  
Figure 1A

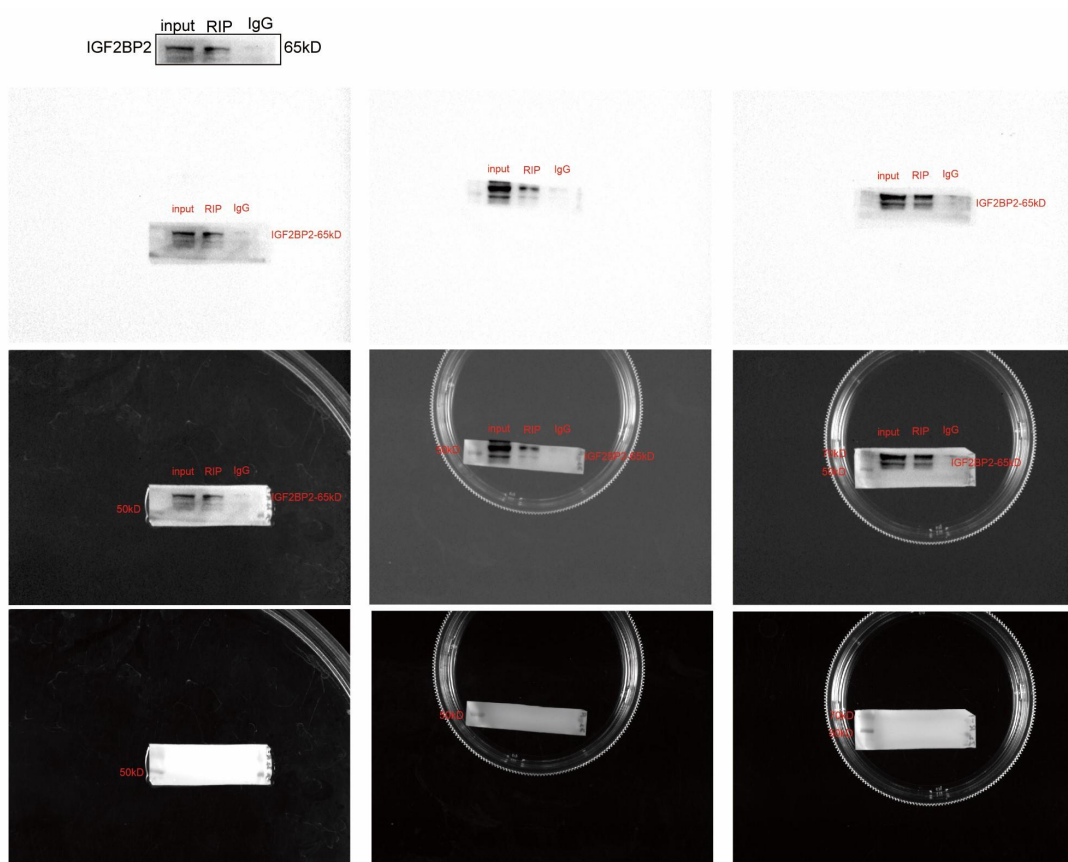

Figure 1B

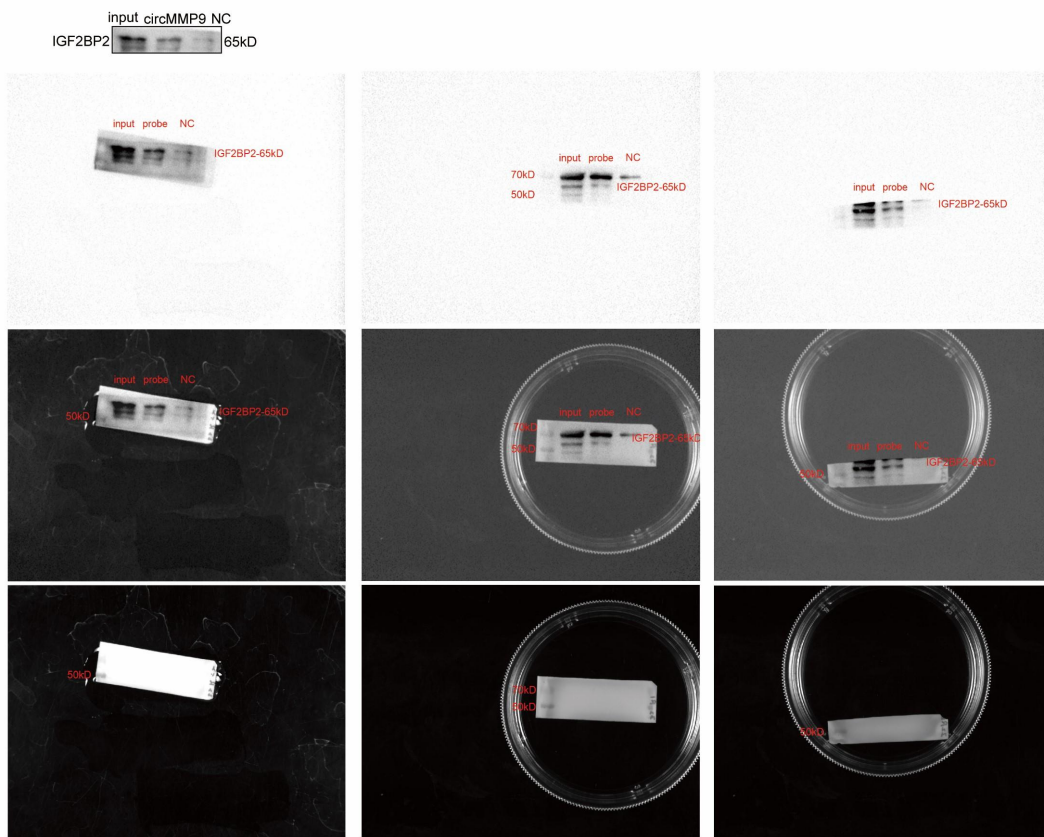

Figure 1C

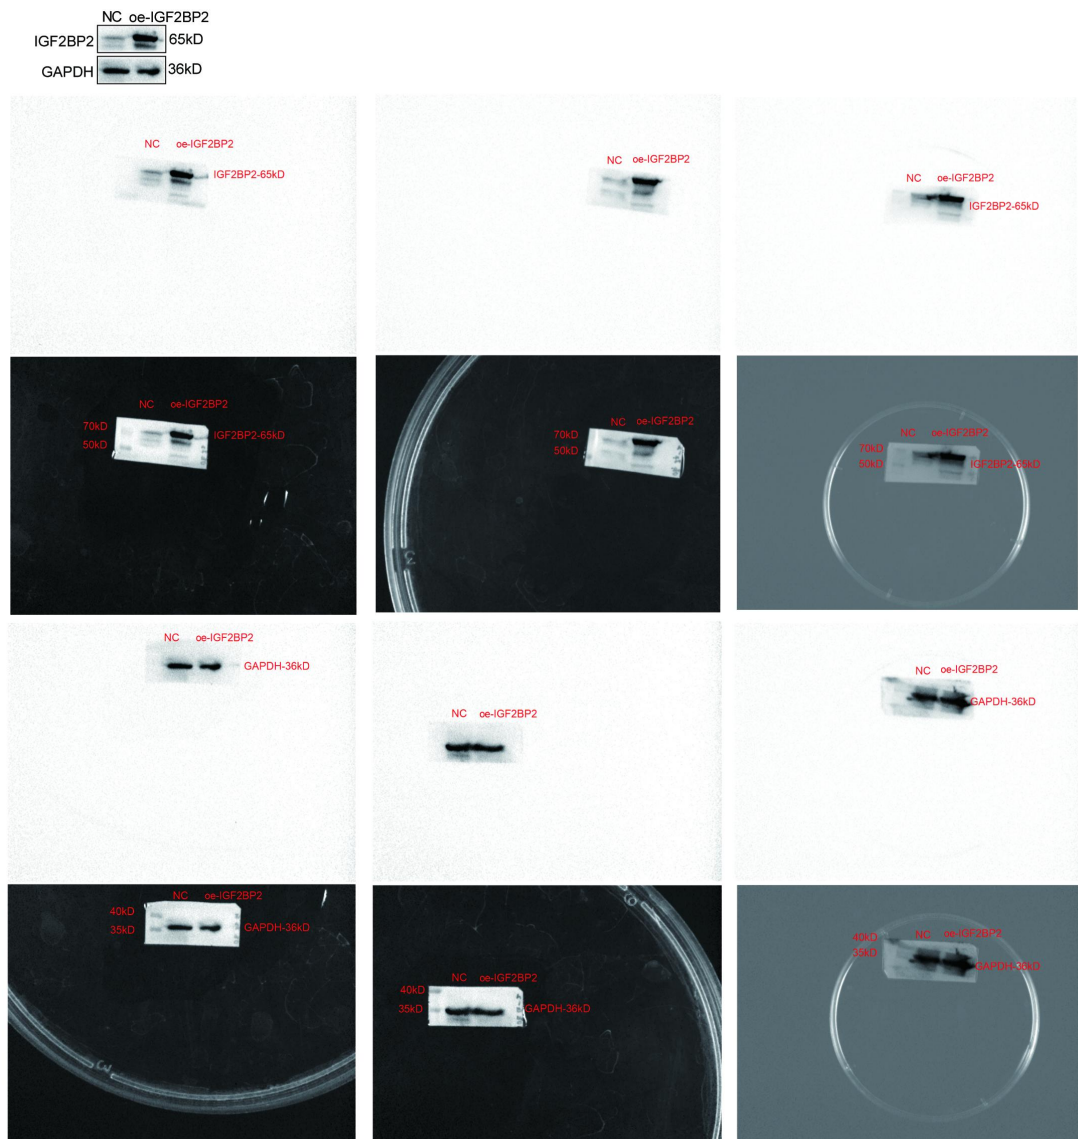

Figure 1D

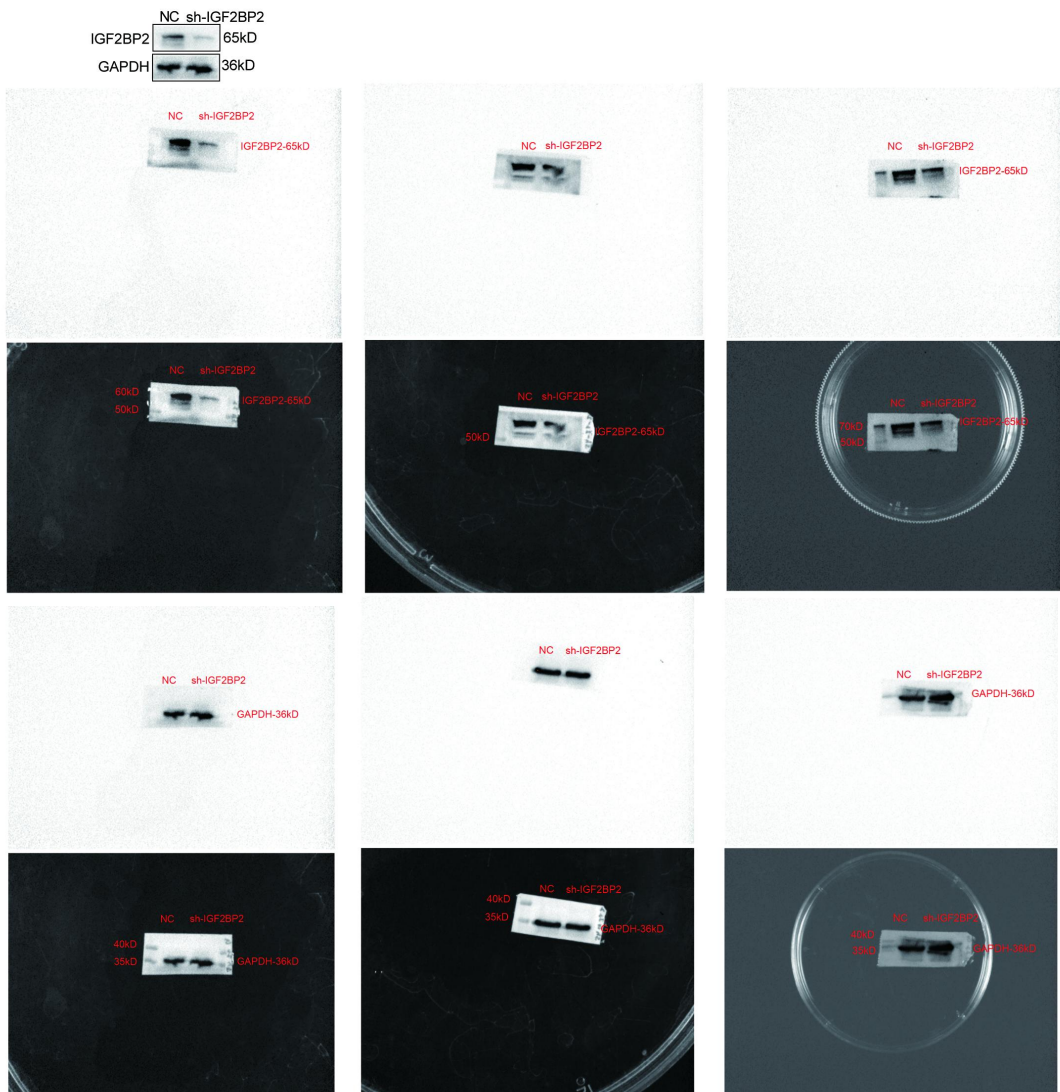

Figure 1E

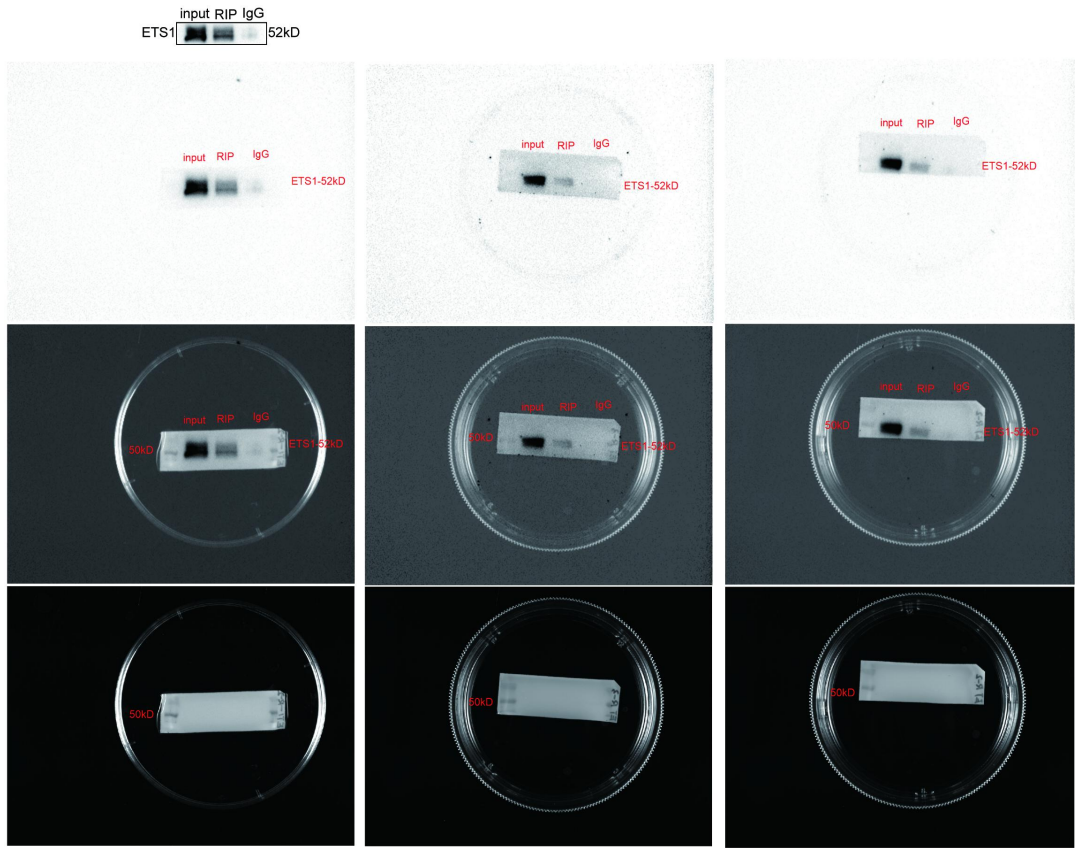

Figure 1F

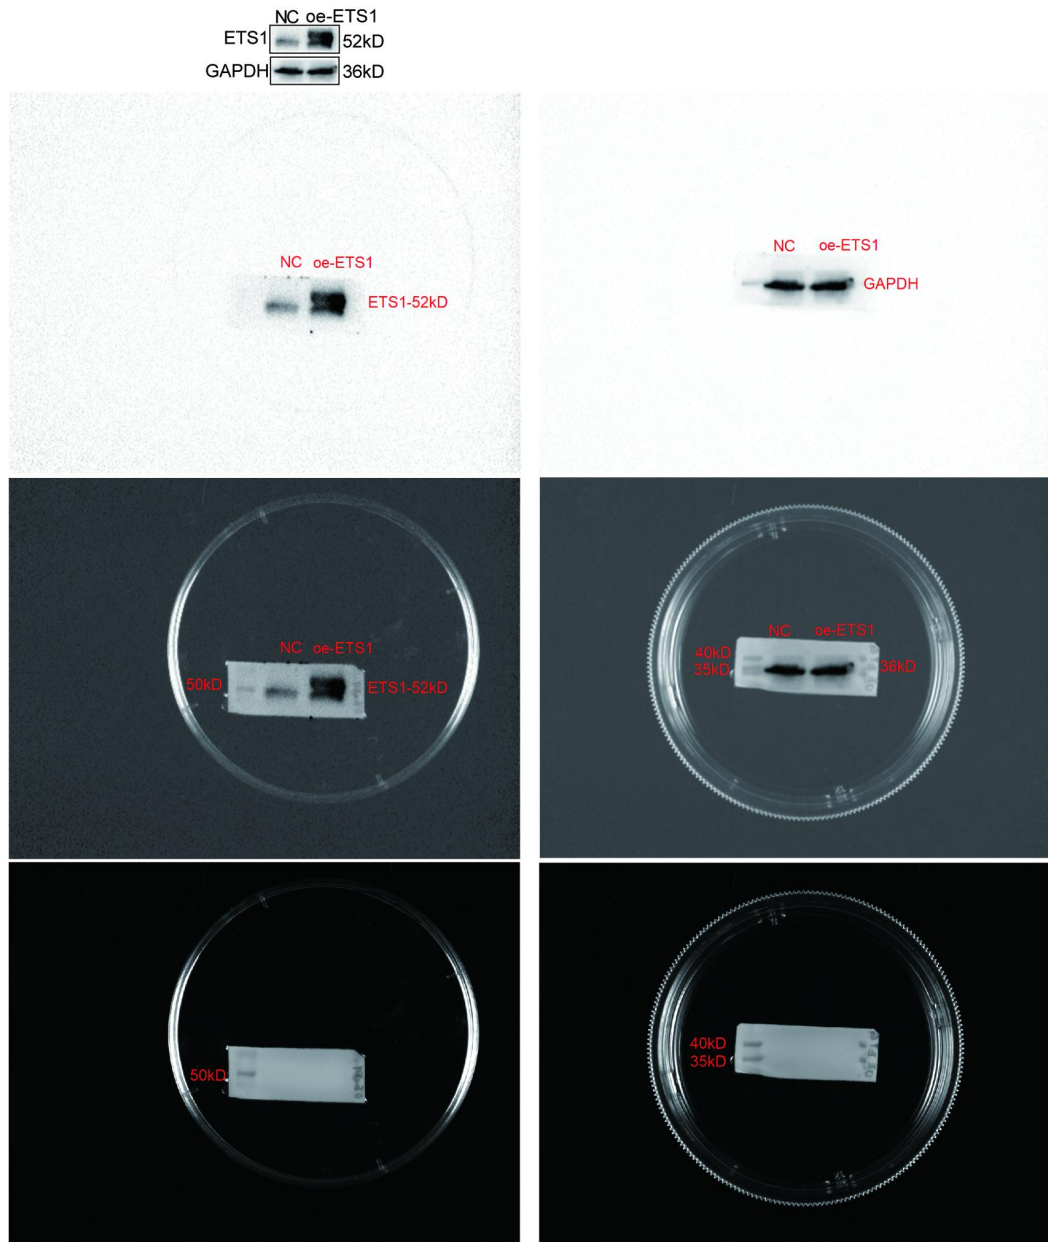

Figure 1G

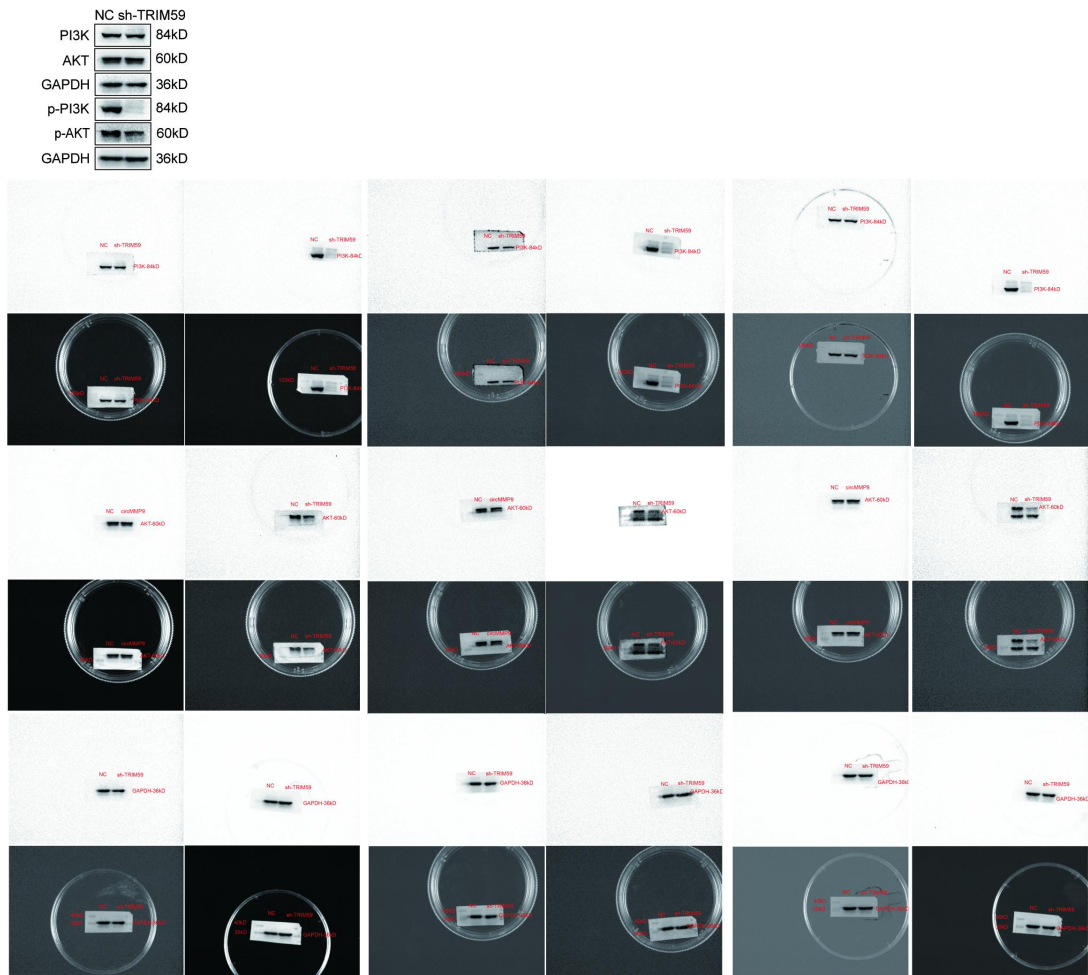

Figure 1H

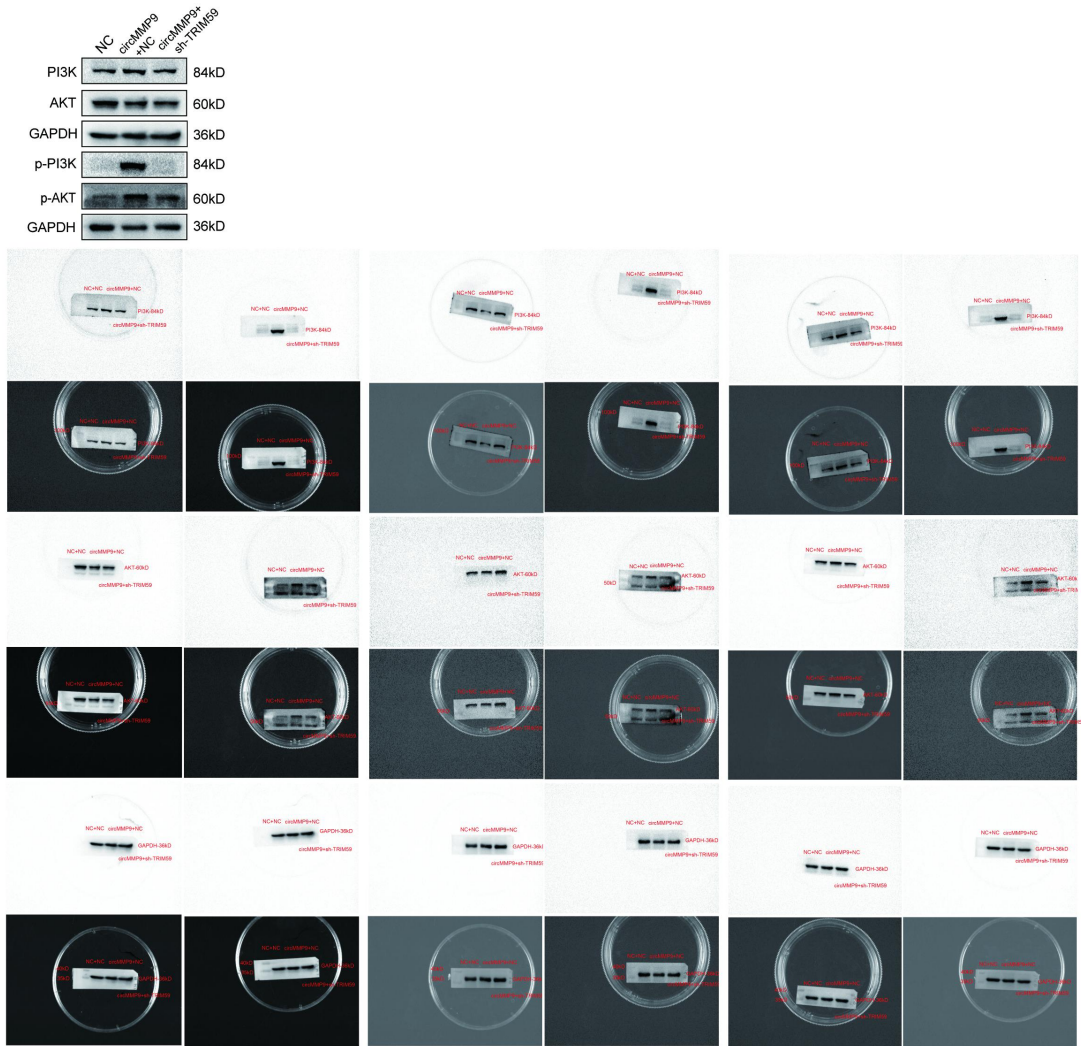

Supplement: 41598_2024_53422_MOESM1_ESM.pdf [file 41598_2024_53422_MOESM1_ESM.pdf]
